# Supplementary material
Source: HighWire-hosted journal article supplement (https://jnm.snmjournals.org/highwire/filestream/94433/field_highwire_adjunct_files/0/115493_Supplemental_Data.pdf)
Supplement: 115493_Supplemental_Data.pdf [file 115493_Supplemental_Data.pdf]

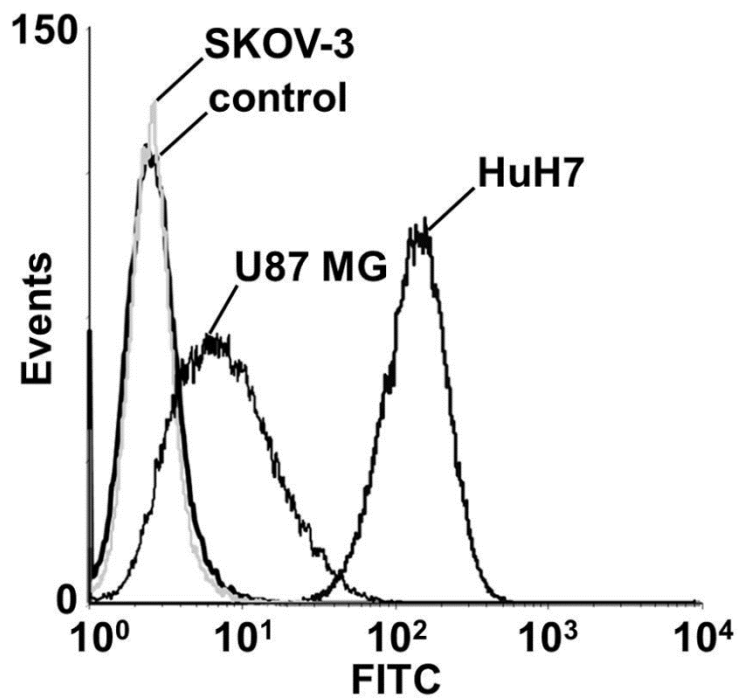

#### **SUPPLEMENTAL FIGURE 1**

##### **Fluorescence-Activated Cell Scanning (FACS) Analysis of CAR Expression**

FACS analysis revealed high levels of CAR expression on the cell surface of HuH7, low CAR levels on U87 MG cells, and confirmed SKOV-3 cells to be CAR-negative.

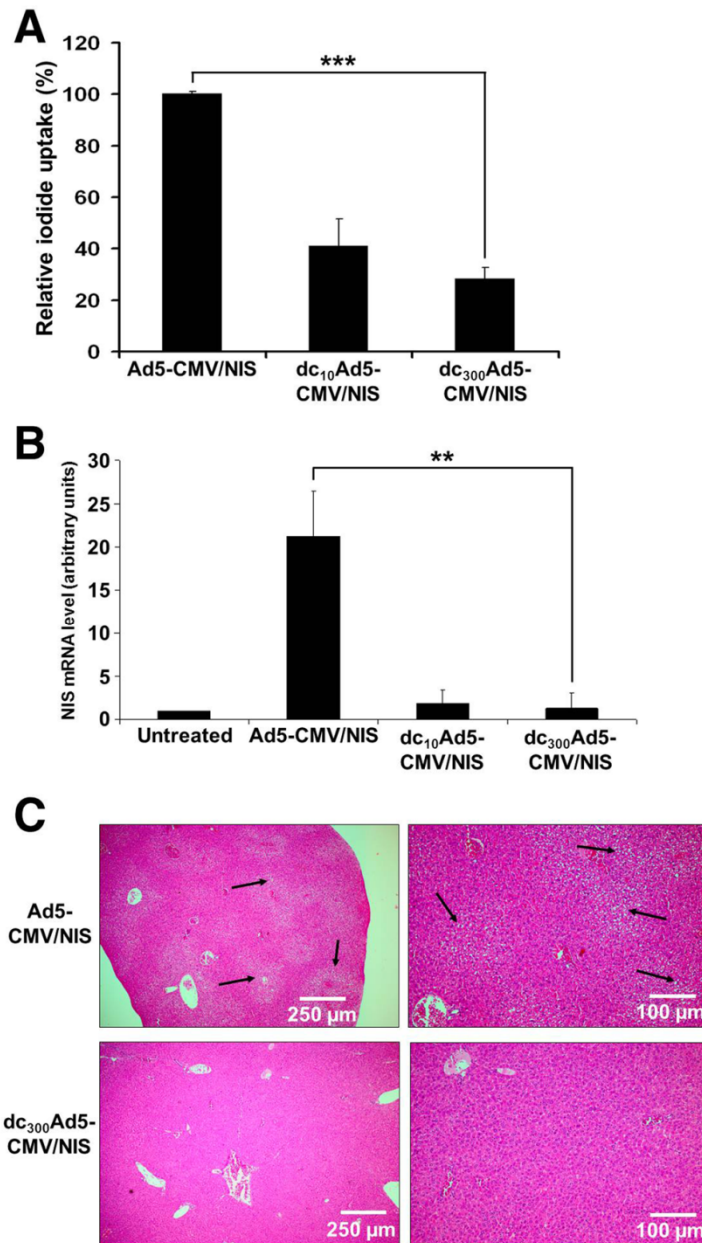

## SUPPLEMENTAL FIGURE 2

### Adenoviral NIS Gene Transfer and Toxicity

Hepatic accumulation of  $^{123}\text{I}$  after i.v. injection of Ad5-CMV/NIS was significantly reduced (up to 70%) by coating of the virus (A). These results were further confirmed by analysis of hepatic NIS mRNA expression (B) and correlated well with a simultaneous reduction of liver toxicity as seen by H/E staining of liver tissue (C).

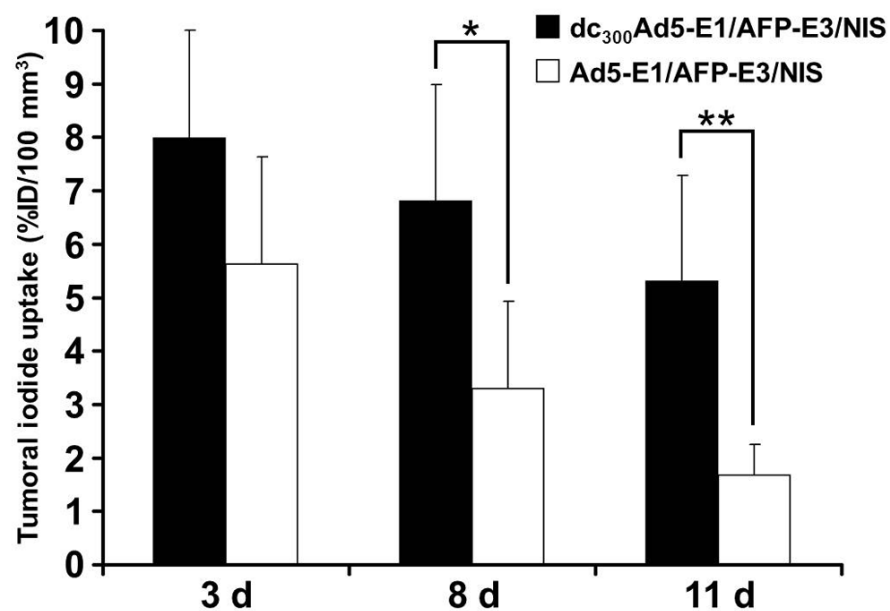

### SUPPLEMENTAL FIGURE 3

#### Quantification of Tumoral Iodine Uptake

Serial quantification of tumoral iodide uptake activity over several days confirmed significantly higher levels of tumor-specific, NIS-mediated iodide accumulation after i.v. injection of  $dc_{300}$ Ad5-E1/AFP-E3/NIS as compared to injection of Ad5-E1/AFP-E3/NIS.
